# Supplementary material for: Exploring the Lifetime Effect of Children on Wellbeing Using Two-Sample Mendelian Randomisation
Source: MDPI journal article supplement (doi:10.3390/genes14030716), 2023-03-14
Supplement: s1 [file s1]

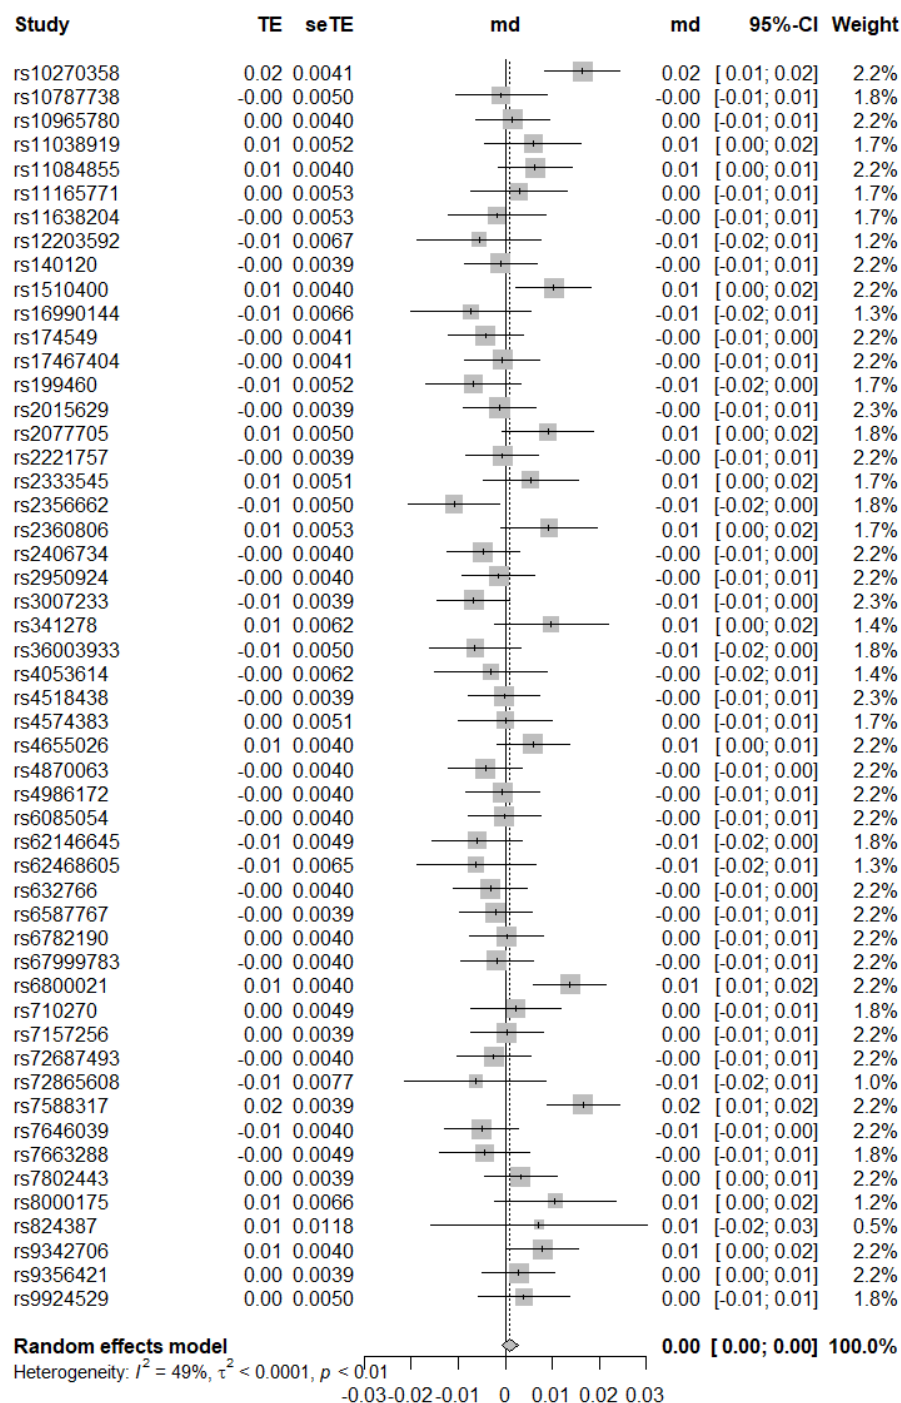

Supplementary Figure S3: Difference in SNP-outcome associations between the UKB and SSGAC when using a  $5 \times 10^{-6}$  p-value threshold.
