# Supplementary material for: Exploring the Lifetime Effect of Children on Wellbeing Using Two-Sample Mendelian Randomisation
Source: Genes (Basel). 2023 Mar 14;14(3):716. doi: 10.3390/genes14030716 (PMC10048211; doi:10.3390/genes14030716)
Supplement: Supplementary file 1 [file genes-14-00716-s001.zip]

Archive with 8 entries (8 files):
- cwb sup mat.pdf
- cwb sup tabs.xlsx
- cwb Supplementary Figure S1.pdf
- cwb Supplementary Figure S2.pdf
- cwb Supplementary Figure S3.pdf
- cwb Supplementary Figure S4.pdf
- cwb Supplementary Figure S5.pdf
- cwb Supplementary Figure S6.pdf
