# Supplementary material for: Exploring the Lifetime Effect of Children on Wellbeing Using Two-Sample Mendelian Randomisation
Source: Genes (Basel). 2023 Mar 14;14(3):716. doi: 10.3390/genes14030716 (PMC10048211; doi:10.3390/genes14030716)
Supplement: Supplementary file 1 [file genes-14-00716-s001.zip › cwb sup tabs.xlsx]

## Sheet: s tab 1
	SNP	effect_allele.exposure	other_allele.exposure	effect_allele.outcome	other_allele.outcome	beta.exposure	beta.outcome	eaf.exposure	eaf.outcome	remove	palindromic	ambiguous	id.outcome	chr	pos	se.outcome	samplesize.outcome	pval.outcome	outcome	originalname.outcome	outcome.deprecated	mr_keep.outcome	data_source.outcome	proxy.outcome	target_snp.outcome	proxy_snp.outcome	target_a1.outcome	target_a2.outcome	proxy_a1.outcome	proxy_a2.outcome	chr.exposure	pos.exposure	se.exposure	pval.exposure	samplesize.exposure	id.exposure	exposure	mr_keep.exposure	pval_origin.exposure	data_source.exposure	action	mr_keep	units.outcome	units.exposure	rsq.exposure	effective_n.exposure	rsq.outcome	effective_n.outcome	steiger_dir
1	rs10270358	G	A	G	A	0.0162658	0.011	0.6937	0.6884	FALSE	FALSE	FALSE	ieu-a-1009	7	114948351	0.003	298420	0.000841899	Subjective well being || id:ieu-a-1009	Subjective well being	Subjective well being || ||	TRUE	igd	NA	NA	NA	NA	NA	NA	NA	7	114948351	0.0022	1.962e-14	460654	ieu-b-4760	Number of children || id:ieu-b-4760	TRUE	reported	igd	2	TRUE	NA	NA	0.000118654	460654	4.50504e-05	298420	TRUE
2	rs2360806	C	A	C	A	0.0163464	0.007	0.1666	0.2015	FALSE	FALSE	FALSE	ieu-a-1009	8	53125734	0.004	298420	0.1236	Subjective well being || id:ieu-a-1009	Subjective well being	Subjective well being || ||	TRUE	igd	NA	NA	NA	NA	NA	NA	NA	8	53125734	0.0027	1.01e-09	460654	ieu-b-4760	Number of children || id:ieu-b-4760	TRUE	reported	igd	2	TRUE	NA	NA	7.95624e-05	460654	1.02623e-05	298420	TRUE
3	rs4870063	A	C	A	C	-0.0145776	0.002	0.6443	0.7127	FALSE	FALSE	FALSE	ieu-a-1009	6	152260668	0.003	298420	0.514	Subjective well being || id:ieu-a-1009	Subjective well being	Subjective well being || ||	TRUE	igd	TRUE	rs4870063	rs4583998	C	A	A	G	6	152244647	0.0021	1.37088e-12	460654	ieu-b-4760	Number of children || id:ieu-b-4760	TRUE	reported	igd	2	TRUE	NA	NA	0.000104596	460654	1.48933e-06	298420	TRUE
4	rs6782190	A	G	A	G	-0.0197197	0.001	0.6467	0.6437	FALSE	FALSE	FALSE	ieu-a-1009	3	85645873	0.003	298420	0.698601	Subjective well being || id:ieu-a-1009	Subjective well being	Subjective well being || ||	TRUE	igd	TRUE	rs6782190	rs2044725	G	A	C	T	3	85639672	0.0021	8.22243e-22	460654	ieu-b-4760	Number of children || id:ieu-b-4760	TRUE	reported	igd	2	TRUE	NA	NA	0.000191385	460654	3.72334e-07	298420	TRUE
5	rs6800021	A	G	A	G	0.0121422	0.007	0.4251	0.4049	FALSE	FALSE	FALSE	ieu-a-1009	3	50202231	0.003	298420	0.0286999	Subjective well being || id:ieu-a-1009	Subjective well being	Subjective well being || ||	TRUE	igd	TRUE	rs6800021	rs2624839	A	G	C	T	3	50190346	0.002	1.032e-09	460654	ieu-b-4760	Number of children || id:ieu-b-4760	TRUE	reported	igd	2	TRUE	NA	NA	8.00067e-05	460654	1.8244e-05	298420	TRUE
6	rs72687493	A	C	A	C	0.0116077	-0.007	0.3627	0.4086	FALSE	FALSE	FALSE	ieu-a-1009	14	79607180	0.003	298420	0.0358204	Subjective well being || id:ieu-a-1009	Subjective well being	Subjective well being || ||	TRUE	igd	TRUE	rs72687493	rs12879491	A	C	T	C	14	79603782	0.0021	2.48302e-08	460654	ieu-b-4760	Number of children || id:ieu-b-4760	TRUE	reported	igd	2	TRUE	NA	NA	6.63214e-05	460654	1.8244e-05	298420	TRUE
[truncated: 1 more columns]

## Sheet: s tab 2
	SNP	effect_allele.exposure	other_allele.exposure	effect_allele.outcome	other_allele.outcome	beta.exposure	beta.outcome	eaf.exposure	eaf.outcome	remove	palindromic	ambiguous	id.outcome	chr	pos	se.outcome	samplesize.outcome	pval.outcome	outcome	originalname.outcome	outcome.deprecated	mr_keep.outcome	data_source.outcome	proxy.outcome	target_snp.outcome	proxy_snp.outcome	target_a1.outcome	target_a2.outcome	proxy_a1.outcome	proxy_a2.outcome	chr.exposure	pos.exposure	se.exposure	pval.exposure	samplesize.exposure	id.exposure	exposure	mr_keep.exposure	pval_origin.exposure	data_source.exposure	action	mr_keep	units.outcome	units.exposure	rsq.exposure	effective_n.exposure	rsq.outcome	effective_n.outcome	steiger_dir
1	rs10270358	G	A	G	A	0.0156507	0.011	0.6937	0.6884	FALSE	FALSE	FALSE	ieu-a-1009	7	114948351	0.003	298420	0.000841899	Subjective well being || id:ieu-a-1009	Subjective well being	Subjective well being || ||	TRUE	igd	NA	NA	NA	NA	NA	NA	NA	7	114948351	0.0022	1.962e-14	460654	ieu-b-4760	|| id:ieu-b-4760	TRUE	reported	igd	2	TRUE	NA	NA	0.00010985	460654	4.50504e-05	298420	TRUE
2	rs10787738	T	C	T	C	0.0106706	-0.003	0.2546	0.2743	FALSE	FALSE	FALSE	ieu-a-1009	10	118777371	0.004	298420	0.3541	Subjective well being || id:ieu-a-1009	Subjective well being	Subjective well being || ||	TRUE	igd	NA	NA	NA	NA	NA	NA	NA	10	118777371	0.0023	3.94103e-06	460654	ieu-b-4760	|| id:ieu-b-4760	TRUE	reported	igd	2	TRUE	NA	NA	4.6723e-05	460654	1.88494e-06	298420	TRUE
3	rs10965780	G	C	G	C	-0.00985137	0.003	0.5848	0.5914	FALSE	TRUE	FALSE	ieu-a-1009	9	23341715	0.003	298420	0.3201	Subjective well being || id:ieu-a-1009	Subjective well being	Subjective well being || ||	TRUE	igd	NA	NA	NA	NA	NA	NA	NA	9	23341715	0.002	4.86194e-07	460654	ieu-b-4760	|| id:ieu-b-4760	TRUE	reported	igd	2	TRUE	NA	NA	5.26668e-05	460654	3.35099e-06	298420	TRUE
4	rs11038919	G	A	G	A	0.0123588	0.004	0.1679	0.166	FALSE	FALSE	FALSE	ieu-a-1009	11	46585781	0.004	298420	0.3237	Subjective well being || id:ieu-a-1009	Subjective well being	Subjective well being || ||	TRUE	igd	NA	NA	NA	NA	NA	NA	NA	11	46585781	0.0027	3.89099e-06	460654	ieu-b-4760	|| id:ieu-b-4760	TRUE	reported	igd	2	TRUE	NA	NA	4.54813e-05	460654	3.35099e-06	298420	TRUE
5	rs11084855	G	A	G	A	0.00958742	0.003	0.3601	0.4086	FALSE	FALSE	FALSE	ieu-a-1009	19	36858944	0.003	298420	0.3425	Subjective well being || id:ieu-a-1009	Subjective well being	Subjective well being || ||	TRUE	igd	TRUE	rs11084855	rs11084857	G	A	G	A	19	36833040	0.0021	4.25197e-06	460654	ieu-b-4760	|| id:ieu-b-4760	TRUE	reported	igd	2	TRUE	NA	NA	4.52452e-05	460654	3.35099e-06	298420	TRUE
6	rs11165771	A	G	A	G	0.0136182	-0.001	0.1668	0.166	FALSE	FALSE	FALSE	ieu-a-1009	1	97527092	0.004	298420	0.7541	Subjective well being || id:ieu-a-1009	Subjective well being	Subjective well being || ||	TRUE	igd	TRUE	rs11165771	rs12095325	A	G	T	C	1	97510741	0.0027	9.166e-08	460654	ieu-b-4760	|| id:ieu-b-4760	TRUE	reported	igd	2	TRUE	NA	NA	5.52225e-05	460654	2.09438e-07	298420	TRUE
7	rs11638204	T	C	T	C	-0.0126	0	0.1581	0.1418	FALSE	FALSE	FALSE	ieu-a-1009	15	41021280	0.004	298420	0.9164	Subjective well being || id:ieu-a-1009	Subjective well being	Subjective well being || ||	TRUE	igd	TRUE	rs11638204	rs4417527	T	C	G	C	15	41000508	0.0028	4.51898e-06	460654	ieu-b-4760	|| id:ieu-b-4760	TRUE	reported	igd	2	TRUE	NA	NA	4.39575e-05	460654	0	298420	TRUE
8	rs12203592	T	C	T	C	-0.0120838	0.001	0.2196	0.1325	FALSE	FALSE	FALSE	ieu-a-1009	6	396321	0.006	298420	0.893	Subjective well being || id:ieu-a-1009	Subjective well being	Subjective well being || ||	TRUE	igd	NA	NA	NA	NA	NA	NA	NA	6	396321	0.0024	1.044e-07	460654	ieu-b-4760	|| id:ieu-b-4760	TRUE	reported	igd	2	TRUE	NA	NA	5.50282e-05	460654	9.30834e-08	298420	TRUE
9	rs140120	C	T	C	T	0.00922745	-0.001	0.5133	0.5093	FALSE	FALSE	FALSE	ieu-a-1009	22	30138548	0.003	298420	0.706601	Subjective well being || id:ieu-a-1009	Subjective well being	Subjective well being || ||	TRUE	igd	NA	NA	NA	NA	NA	NA	NA	22	30138548	0.002	3.72804e-06	460654	ieu-b-4760	|| id:ieu-b-4760	TRUE	reported	igd	2	TRUE	NA	NA	4.62073e-05	460654	3.72334e-07	298420	TRUE
10	rs1510400	A	G	A	G	0.00988741	0.007	0.6542	0.7034	FALSE	FALSE	FALSE	ieu-a-1009	5	84322960	0.003	298420	0.0367401	Subjective well being || id:ieu-a-1009	Subjective well being	Subjective well being || ||	TRUE	igd	NA	NA	NA	NA	NA	NA	NA	5	84322960	0.0021	1.67498e-06	460654	ieu-b-4760	|| id:ieu-b-4760	TRUE	reported	igd	2	TRUE	NA	NA	4.81207e-05	460654	1.8244e-05	298420	TRUE
11	rs16990144	G	A	G	A	-0.0162808	-0.01	0.0992	0.08396	FALSE	FALSE	FALSE	ieu-a-1009	4	34676437	0.005	298420	0.0540194	Subjective well being || id:ieu-a-1009	Subjective well being	Subjective well being || ||	TRUE	igd	NA	NA	NA	NA	NA	NA	NA	4	34676437	0.0034	6.45104e-07	460654	ieu-b-4760	|| id:ieu-b-4760	TRUE	reported	igd	2	TRUE	NA	NA	4.97737e-05	460654	1.34038e-05	298420	TRUE
12	rs174549	A	G	A	G	-0.0106697	-0.003	0.3083	0.2687	FALSE	FALSE	FALSE	ieu-a-1009	11	61571382	0.003	298420	0.3965	Subjective well being || id:ieu-a-1009	Subjective well being	Subjective well being || ||	TRUE	igd	NA	NA	NA	NA	NA	NA	NA	11	61571382	0.0022	3.457e-07	460654	ieu-b-4760	|| id:ieu-b-4760	TRUE	reported	igd	2	TRUE	NA	NA	5.10578e-05	460654	3.35099e-06	298420	TRUE
13	rs17467404	A	C	A	C	-0.010233	-0.001	0.2994	0.2966	FALSE	FALSE	FALSE	ieu-a-1009	11	83351780	0.003	298420	0.724399	Subjective well being || id:ieu-a-1009	Subjective well being	Subjective well being || ||	TRUE	igd	TRUE	rs17467404	rs4143852	A	C	A	G	11	83351666	0.0022	2.053e-06	460654	ieu-b-4760	|| id:ieu-b-4760	TRUE	reported	igd	2	TRUE	NA	NA	4.69645e-05	460654	3.72334e-07	298420	TRUE
14	rs199460	C	A	C	A	0.0135542	-0.002	0.1987	0.2873	FALSE	FALSE	FALSE	ieu-a-1009	17	44788310	0.004	298420	0.6585	Subjective well being || id:ieu-a-1009	Subjective well being	Subjective well being || ||	TRUE	igd	TRUE	rs199460	rs183211	C	A	A	G	17	44764775	0.0026	1.854e-08	460654	ieu-b-4760	|| id:ieu-b-4760	TRUE	reported	igd	2	TRUE	NA	NA	5.89932e-05	460654	8.3775e-07	298420	TRUE
15	rs2015629	T	A	T	A	-0.00941571	-0.001	0.4949	0.4944	FALSE	TRUE	TRUE	ieu-a-1009	11	8585384	0.003	298420	0.8057	Subjective well being || id:ieu-a-1009	Subjective well being	Subjective well being || ||	TRUE	igd	TRUE	rs2015629	rs9300090	A	T	G	A	11	8564426	0.002	1.95398e-06	460654	ieu-b-4760	|| id:ieu-b-4760	TRUE	reported	igd	2	FALSE	NA	NA	4.81118e-05	460654	3.72334e-07	298420	TRUE
16	rs2077705	A	T	A	T	-0.0110963	0.001	0.2539	0.2313	FALSE	TRUE	FALSE	ieu-a-1009	13	58382520	0.004	298420	0.8187	Subjective well being || id:ieu-a-1009	Subjective well being	Subjective well being || ||	TRUE	igd	NA	NA	NA	NA	NA	NA	NA	13	58382520	0.0023	6.36796e-07	460654	ieu-b-4760	|| id:ieu-b-4760	TRUE	reported	igd	2	TRUE	NA	NA	5.05252e-05	460654	2.09438e-07	298420	TRUE
17	rs2221757	A	G	A	G	-0.00934043	0.001	0.4389	0.4571	FALSE	FALSE	FALSE	ieu-a-1009	3	68508344	0.003	298420	0.675601	Subjective well being || id:ieu-a-1009	Subjective well being	Subjective well being || ||	TRUE	igd	NA	NA	NA	NA	NA	NA	NA	3	68508344	0.002	2.91702e-06	460654	ieu-b-4760	|| id:ieu-b-4760	TRUE	reported	igd	2	TRUE	NA	NA	4.73456e-05	460654	3.72334e-07	298420	TRUE
18	rs2333545	A	G	A	G	0.0119823	0.001	0.8076	0.8246	FALSE	FALSE	FALSE	ieu-a-1009	14	29674367	0.004	298420	0.8053	Subjective well being || id:ieu-a-1009	Subjective well being	Subjective well being || ||	TRUE	igd	NA	NA	NA	NA	NA	NA	NA	14	29674367	0.0025	1.13399e-06	460654	ieu-b-4760	|| id:ieu-b-4760	TRUE	reported	igd	2	TRUE	NA	NA	4.98662e-05	460654	2.09438e-07	298420	TRUE
19	rs2356662	C	T	C	T	-0.0121101	-0.006	0.771	0.7743	FALSE	FALSE	FALSE	ieu-a-1009	8	65133678	0.004	298420	0.1305	Subjective well being || id:ieu-a-1009	Subjective well being	Subjective well being || ||	TRUE	igd	NA	NA	NA	NA	NA	NA	NA	8	65133678	0.0024	5.84198e-08	460654	ieu-b-4760	|| id:ieu-b-4760	TRUE	reported	igd	2	TRUE	NA	NA	5.52684e-05	460654	7.5397e-06	298420	TRUE
20	rs2360806	C	A	C	A	0.0154238	0.007	0.1666	0.2015	FALSE	FALSE	FALSE	ieu-a-1009	8	53125734	0.004	298420	0.1236	Subjective well being || id:ieu-a-1009	Subjective well being	Subjective well being || ||	TRUE	igd	NA	NA	NA	NA	NA	NA	NA	8	53125734	0.0027	1.01e-09	460654	ieu-b-4760	|| id:ieu-b-4760	TRUE	reported	igd	2	TRUE	NA	NA	7.08355e-05	460654	1.02623e-05	298420	TRUE
21	rs2406734	C	T	C	T	0.00947985	0.001	0.4253	0.4104	FALSE	FALSE	FALSE	ieu-a-1009	4	138337021	0.003	298420	0.656401	Subjective well being || id:ieu-a-1009	Subjective well being	Subjective well being || ||	TRUE	igd	NA	NA	NA	NA	NA	NA	NA	4	138337021	0.002	1.798e-06	460654	ieu-b-4760	|| id:ieu-b-4760	TRUE	reported	igd	2	TRUE	NA	NA	4.87695e-05	460654	3.72334e-07	298420	TRUE
22	rs2950924	T	C	T	C	-0.00941571	-0.004	0.4201	0.3974	FALSE	FALSE	FALSE	ieu-a-1009	8	35181638	0.003	298420	0.1954	Subjective well being || id:ieu-a-1009	Subjective well being	Subjective well being || ||	TRUE	igd	NA	NA	NA	NA	NA	NA	NA	8	35181638	0.002	2.12202e-06	460654	ieu-b-4760	|| id:ieu-b-4760	TRUE	reported	igd	2	TRUE	NA	NA	4.81118e-05	460654	5.95731e-06	298420	TRUE
23	rs3007233	T	C	T	C	-0.00927987	-0.006	0.5037	0.5429	FALSE	FALSE	FALSE	ieu-a-1009	13	105912079	0.003	298420	0.0806993	Subjective well being || id:ieu-a-1009	Subjective well being	Subjective well being || ||	TRUE	igd	TRUE	rs3007233	rs3015366	C	T	G	A	13	105911680	0.002	2.84001e-06	460654	ieu-b-4760	|| id:ieu-b-4760	TRUE	reported	igd	2	TRUE	NA	NA	4.67337e-05	460654	1.34038e-05	298420	TRUE
24	rs341278	A	C	A	C	-0.0146263	0.013	0.1407	0.1847	FALSE	FALSE	FALSE	ieu-a-1009	5	106869034	0.005	298420	0.00369097	Subjective well being || id:ieu-a-1009	Subjective well being	Subjective well being || ||	TRUE	igd	NA	NA	NA	NA	NA	NA	NA	5	106869034	0.0029	1.12101e-07	460654	ieu-b-4760	|| id:ieu-b-4760	TRUE	reported	igd	2	TRUE	NA	NA	5.52173e-05	460654	2.26523e-05	298420	TRUE
25	rs36003933	A	G	A	G	-0.0112893	-0.005	0.2409	0.2631	FALSE	FALSE	FALSE	ieu-a-1009	3	2227373	0.004	298420	0.1586	Subjective well being || id:ieu-a-1009	Subjective well being	Subjective well being || ||	TRUE	igd	TRUE	rs36003933	rs17009194	A	G	A	G	3	2227199	0.0024	1.09799e-06	460654	ieu-b-4760	|| id:ieu-b-4760	TRUE	reported	igd	2	TRUE	NA	NA	4.80302e-05	460654	5.23592e-06	298420	TRUE
26	rs4053614	C	T	C	T	-0.0133231	-0.003	0.1455	0.1269	FALSE	FALSE	FALSE	ieu-a-1009	6	90695981	0.005	298420	0.5362	Subjective well being || id:ieu-a-1009	Subjective well being	Subjective well being || ||	TRUE	igd	NA	NA	NA	NA	NA	NA	NA	6	90695981	0.0029	2.69699e-06	460654	ieu-b-4760	|| id:ieu-b-4760	TRUE	reported	igd	2	TRUE	NA	NA	4.58166e-05	460654	1.20636e-06	298420	TRUE
27	rs4518438	C	T	C	T	0.00969971	-0.002	0.5099	0.4944	FALSE	FALSE	FALSE	ieu-a-1009	5	88157552	0.003	298420	0.6293	Subjective well being || id:ieu-a-1009	Subjective well being	Subjective well being || ||	TRUE	igd	NA	NA	NA	NA	NA	NA	NA	5	88157552	0.002	5.35698e-07	460654	ieu-b-4760	|| id:ieu-b-4760	TRUE	reported	igd	2	TRUE	NA	NA	5.10578e-05	460654	1.48933e-06	298420	TRUE
28	rs4574383	G	A	G	A	0.0114539	0.002	0.2059	0.194	FALSE	FALSE	FALSE	ieu-a-1009	4	173916231	0.004	298420	0.637801	Subjective well being || id:ieu-a-1009	Subjective well being	Subjective well being || ||	TRUE	igd	NA	NA	NA	NA	NA	NA	NA	4	173916231	0.0025	4.462e-06	460654	ieu-b-4760	|| id:ieu-b-4760	TRUE	reported	igd	2	TRUE	NA	NA	4.55655e-05	460654	8.3775e-07	298420	TRUE
29	rs4655026	C	T	C	T	0.00954071	0.006	0.5757	0.5429	FALSE	FALSE	FALSE	ieu-a-1009	1	22473658	0.003	298420	0.0804804	Subjective well being || id:ieu-a-1009	Subjective well being	Subjective well being || ||	TRUE	igd	NA	NA	NA	NA	NA	NA	NA	1	22473658	0.002	1.622e-06	460654	ieu-b-4760	|| id:ieu-b-4760	TRUE	reported	igd	2	TRUE	NA	NA	4.93977e-05	460654	1.34038e-05	298420	TRUE
30	rs4870063	A	C	A	C	-0.0139521	0.002	0.6443	0.7127	FALSE	FALSE	FALSE	ieu-a-1009	6	152260668	0.003	298420	0.514	Subjective well being || id:ieu-a-1009	Subjective well being	Subjective well being || ||	TRUE	igd	TRUE	rs4870063	rs4583998	C	A	A	G	6	152244647	0.0021	1.37088e-12	460654	ieu-b-4760	|| id:ieu-b-4760	TRUE	reported	igd	2	TRUE	NA	NA	9.5813e-05	460654	1.48933e-06	298420	TRUE
31	rs4986172	T	C	T	C	-0.00988741	-0.002	0.3426	0.3769	FALSE	FALSE	FALSE	ieu-a-1009	17	43216281	0.003	298420	0.6132	Subjective well being || id:ieu-a-1009	Subjective well being	Subjective well being || ||	TRUE	igd	NA	NA	NA	NA	NA	NA	NA	17	43216281	0.0021	1.78e-06	460654	ieu-b-4760	|| id:ieu-b-4760	TRUE	reported	igd	2	TRUE	NA	NA	4.81207e-05	460654	1.48933e-06	298420	TRUE
32	rs6085054	A	G	A	G	0.00975756	0	0.4036	0.4366	FALSE	FALSE	FALSE	ieu-a-1009	20	5245152	0.003	298420	0.8976	Subjective well being || id:ieu-a-1009	Subjective well being	Subjective well being || ||	TRUE	igd	NA	NA	NA	NA	NA	NA	NA	20	5245152	0.0021	1.5e-06	460654	ieu-b-4760	|| id:ieu-b-4760	TRUE	reported	igd	2	TRUE	NA	NA	4.68652e-05	460654	0	298420	TRUE
33	rs62146645	G	A	G	A	0.0106116	-0.004	0.2694	0.2313	FALSE	FALSE	FALSE	ieu-a-1009	2	59437612	0.004	298420	0.2103	Subjective well being || id:ieu-a-1009	Subjective well being	Subjective well being || ||	TRUE	igd	TRUE	rs62146645	rs10184931	G	A	A	G	2	59419779	0.0023	2.43899e-06	460654	ieu-b-4760	|| id:ieu-b-4760	TRUE	reported	igd	2	TRUE	NA	NA	4.62073e-05	460654	3.35099e-06	298420	TRUE
34	rs62468605	T	G	T	G	0.0153231	-0.008	0.1089	0.09515	FALSE	FALSE	FALSE	ieu-a-1009	7	78173403	0.005	298420	0.1113	Subjective well being || id:ieu-a-1009	Subjective well being	Subjective well being || ||	TRUE	igd	TRUE	rs62468605	rs10953601	T	G	A	G	7	78170074	0.0032	1.034e-06	460654	ieu-b-4760	|| id:ieu-b-4760	TRUE	reported	igd	2	TRUE	NA	NA	4.97737e-05	460654	8.5785e-06	298420	TRUE
35	rs632766	T	A	T	A	0.00964777	-0.003	0.6326	0.653	FALSE	TRUE	FALSE	ieu-a-1009	2	174435080	0.003	298420	0.3019	Subjective well being || id:ieu-a-1009	Subjective well being	Subjective well being || ||	TRUE	igd	NA	NA	NA	NA	NA	NA	NA	2	174435080	0.0021	3.45303e-06	460654	ieu-b-4760	|| id:ieu-b-4760	TRUE	reported	igd	2	TRUE	NA	NA	4.58166e-05	460654	3.35099e-06	298420	TRUE
36	rs6587767	T	C	T	C	-0.00927987	-0.002	0.4549	0.4664	FALSE	FALSE	FALSE	ieu-a-1009	1	57800285	0.003	298420	0.5665	Subjective well being || id:ieu-a-1009	Subjective well being	Subjective well being || ||	TRUE	igd	NA	NA	NA	NA	NA	NA	NA	1	57800285	0.002	3.82296e-06	460654	ieu-b-4760	|| id:ieu-b-4760	TRUE	reported	igd	2	TRUE	NA	NA	4.67337e-05	460654	1.48933e-06	298420	TRUE
37	rs6782190	A	G	A	G	-0.0192576	0	0.6467	0.6231	FALSE	FALSE	FALSE	ieu-a-1009	3	85641825	0.003	298420	0.8998	Subjective well being || id:ieu-a-1009	Subjective well being	Subjective well being || ||	TRUE	igd	TRUE	rs6782190	rs11919099	G	A	G	T	3	85639672	0.0021	8.22243e-22	460654	ieu-b-4760	|| id:ieu-b-4760	TRUE	reported	igd	2	TRUE	NA	NA	0.000182521	460654	0	298420	TRUE
38	rs67999783	T	C	T	C	-0.00968919	0.002	0.3823	0.4272	FALSE	FALSE	FALSE	ieu-a-1009	5	164674149	0.003	298420	0.5864	Subjective well being || id:ieu-a-1009	Subjective well being	Subjective well being || ||	TRUE	igd	TRUE	rs67999783	rs11747004	T	C	A	G	5	164670375	0.0021	2.33297e-06	460654	ieu-b-4760	|| id:ieu-b-4760	TRUE	reported	igd	2	TRUE	NA	NA	4.62108e-05	460654	1.48933e-06	298420	TRUE
39	rs6800021	A	G	A	G	0.0114607	0.007	0.4251	0.4049	FALSE	FALSE	FALSE	ieu-a-1009	3	50202231	0.003	298420	0.0286999	Subjective well being || id:ieu-a-1009	Subjective well being	Subjective well being || ||	TRUE	igd	TRUE	rs6800021	rs2624839	A	G	C	T	3	50190346	0.002	1.032e-09	460654	ieu-b-4760	|| id:ieu-b-4760	TRUE	reported	igd	2	TRUE	NA	NA	7.12785e-05	460654	1.8244e-05	298420	TRUE
40	rs710270	C	G	C	G	-0.0104362	0	0.2831	0.291	FALSE	TRUE	FALSE	ieu-a-1009	14	97486738	0.004	298420	0.9938	Subjective well being || id:ieu-a-1009	Subjective well being	Subjective well being || ||	TRUE	igd	NA	NA	NA	NA	NA	NA	NA	14	97486738	0.0022	1.54301e-06	460654	ieu-b-4760	|| id:ieu-b-4760	TRUE	reported	igd	2	TRUE	NA	NA	4.8848e-05	460654	0	298420	TRUE
41	rs7157256	G	A	G	A	0.0100918	-0.004	0.5436	0.5634	FALSE	FALSE	FALSE	ieu-a-1009	14	46854616	0.003	298420	0.1914	Subjective well being || id:ieu-a-1009	Subjective well being	Subjective well being || ||	TRUE	igd	TRUE	rs7157256	rs7159042	A	G	T	C	14	46854439	0.002	9.04003e-08	460654	ieu-b-4760	|| id:ieu-b-4760	TRUE	reported	igd	2	TRUE	NA	NA	5.52684e-05	460654	5.95731e-06	298420	TRUE
42	rs72687493	A	C	A	C	0.0108214	-0.007	0.3627	0.4104	FALSE	FALSE	FALSE	ieu-a-1009	14	79605692	0.003	298420	0.0405303	Subjective well being || id:ieu-a-1009	Subjective well being	Subjective well being || ||	TRUE	igd	TRUE	rs72687493	rs12890392	A	C	T	C	14	79603782	0.0021	2.48302e-08	460654	ieu-b-4760	|| id:ieu-b-4760	TRUE	reported	igd	2	TRUE	NA	NA	5.76411e-05	460654	1.8244e-05	298420	TRUE
43	rs72865608	A	G	A	G	-0.0191655	-0.004	0.0772	0.07649	FALSE	FALSE	FALSE	ieu-a-1009	18	456330	0.006	298420	0.519501	Subjective well being || id:ieu-a-1009	Subjective well being	Subjective well being || ||	TRUE	igd	TRUE	rs72865608	rs16944807	A	G	T	C	18	449445	0.0038	9.01301e-08	460654	ieu-b-4760	|| id:ieu-b-4760	TRUE	reported	igd	2	TRUE	NA	NA	5.52173e-05	460654	1.48933e-06	298420	TRUE
44	rs7588317	A	G	A	G	0.00976462	0.006	0.4897	0.5037	FALSE	FALSE	FALSE	ieu-a-1009	2	22132882	0.003	298420	0.0643902	Subjective well being || id:ieu-a-1009	Subjective well being	Subjective well being || ||	TRUE	igd	NA	NA	NA	NA	NA	NA	NA	2	22132882	0.002	3.90104e-07	460654	ieu-b-4760	|| id:ieu-b-4760	TRUE	reported	igd	2	TRUE	NA	NA	5.17435e-05	460654	1.34038e-05	298420	TRUE
45	rs7646039	T	C	T	C	-0.0103936	-0.004	0.3841	0.403	FALSE	FALSE	FALSE	ieu-a-1009	3	114076135	0.003	298420	0.2534	Subjective well being || id:ieu-a-1009	Subjective well being	Subjective well being || ||	TRUE	igd	NA	NA	NA	NA	NA	NA	NA	3	114076135	0.0021	1.276e-07	460654	ieu-b-4760	|| id:ieu-b-4760	TRUE	reported	igd	2	TRUE	NA	NA	5.3174e-05	460654	5.95731e-06	298420	TRUE
46	rs7663288	G	A	G	A	0.0110237	-0.001	0.7303	0.6978	FALSE	FALSE	FALSE	ieu-a-1009	4	105324962	0.004	298420	0.6801	Subjective well being || id:ieu-a-1009	Subjective well being	Subjective well being || ||	TRUE	igd	NA	NA	NA	NA	NA	NA	NA	4	105324962	0.0023	5.13902e-07	460654	ieu-b-4760	|| id:ieu-b-4760	TRUE	reported	igd	2	TRUE	NA	NA	4.98662e-05	460654	2.09438e-07	298420	TRUE
47	rs7802443	C	G	C	G	-0.00954071	0.004	0.4414	0.3918	FALSE	TRUE	TRUE	ieu-a-1009	7	50357966	0.003	298420	0.1934	Subjective well being || id:ieu-a-1009	Subjective well being	Subjective well being || ||	TRUE	igd	NA	NA	NA	NA	NA	NA	NA	7	50357966	0.002	1.276e-06	460654	ieu-b-4760	|| id:ieu-b-4760	TRUE	reported	igd	2	FALSE	NA	NA	4.93977e-05	460654	5.95731e-06	298420	TRUE
48	rs8000175	G	C	G	C	0.0156867	0.001	0.9014	0.8862	FALSE	TRUE	FALSE	ieu-a-1009	13	39553701	0.005	298420	0.8277	Subjective well being || id:ieu-a-1009	Subjective well being	Subjective well being || ||	TRUE	igd	TRUE	rs8000175	rs1109625	C	G	T	C	13	39546530	0.0034	3.56303e-06	460654	ieu-b-4760	|| id:ieu-b-4760	TRUE	reported	igd	2	TRUE	NA	NA	4.62073e-05	460654	1.3404e-07	298420	TRUE
49	rs824387	T	C	T	C	-0.0302753	0.011	0.0291	0.02799	FALSE	FALSE	FALSE	ieu-a-1009	6	64088984	0.009	298420	0.2215	Subjective well being || id:ieu-a-1009	Subjective well being	Subjective well being || ||	TRUE	igd	TRUE	rs824387	rs824383	T	C	T	A	6	64087757	0.006	8.60796e-08	460654	ieu-b-4760	|| id:ieu-b-4760	TRUE	reported	igd	2	TRUE	NA	NA	5.52684e-05	460654	5.0058e-06	298420	TRUE
50	rs9342706	T	G	T	G	0.00958742	0.005	0.6033	0.5354	FALSE	FALSE	FALSE	ieu-a-1009	6	69108473	0.003	298420	0.1258	Subjective well being || id:ieu-a-1009	Subjective well being	Subjective well being || ||	TRUE	igd	NA	NA	NA	NA	NA	NA	NA	6	69108473	0.0021	3.52801e-06	460654	ieu-b-4760	|| id:ieu-b-4760	TRUE	reported	igd	2	TRUE	NA	NA	4.52452e-05	460654	9.30826e-06	298420	TRUE
51	rs9356421	C	T	C	T	0.00985137	0	0.457	0.4813	FALSE	FALSE	FALSE	ieu-a-1009	6	166510461	0.003	298420	0.9135	Subjective well being || id:ieu-a-1009	Subjective well being	Subjective well being || ||	TRUE	igd	NA	NA	NA	NA	NA	NA	NA	6	166510461	0.002	3.88401e-07	460654	ieu-b-4760	|| id:ieu-b-4760	TRUE	reported	igd	2	TRUE	NA	NA	5.26668e-05	460654	0	298420	TRUE
52	rs9924529	A	G	A	G	-0.0116055	0.003	0.2483	0.2593	FALSE	FALSE	FALSE	ieu-a-1009	16	63782015	0.004	298420	0.4708	Subjective well being || id:ieu-a-1009	Subjective well being	Subjective well being || ||	TRUE	igd	NA	NA	NA	NA	NA	NA	NA	16	63782015	0.0023	1.75001e-07	460654	ieu-b-4760	|| id:ieu-b-4760	TRUE	reported	igd	2	TRUE	NA	NA	5.52684e-05	460654	1.88494e-06	298420	TRUE
[truncated: 1 more columns]

## Sheet: s tab 3
	SNP	effect_allele.exposure	other_allele.exposure	effect_allele.outcome	other_allele.outcome	beta.exposure	beta.outcome	eaf.exposure	eaf.outcome	remove	palindromic	ambiguous	id.outcome	chr	pos	se.outcome	samplesize.outcome	pval.outcome	outcome	originalname.outcome	outcome.deprecated	mr_keep.outcome	data_source.outcome	chr.exposure	pos.exposure	se.exposure	pval.exposure	samplesize.exposure	id.exposure	exposure	mr_keep.exposure	pval_origin.exposure	data_source.exposure	action	mr_keep	units.outcome	units.exposure	rsq.exposure	effective_n.exposure	rsq.outcome	effective_n.outcome	steiger_dir	steiger_pval
1	rs10270358	G	A	G	A	0.0162658	0	0.6937	NA	FALSE	FALSE	FALSE	ieu-b-4851	7	114948351	0.0098	22656	0.999	Wellbeing || id:ieu-b-4851	Wellbeing	Wellbeing || ||	TRUE	igd	7	114948351	0.0022	1.962e-14	460654	ieu-b-4760	Number of children || id:ieu-b-4760	TRUE	reported	igd	2	TRUE	NA	NA	0.000118654	460654	0	22656	TRUE	0.109454
2	rs201945769	C	T	C	T	-0.0131	0.0113	0.7685	NA	FALSE	FALSE	FALSE	ieu-b-4851	8	65121299	0.0117	21037	0.3328	Wellbeing || id:ieu-b-4851	Wellbeing	Wellbeing || ||	TRUE	igd	8	65121299	0.0024	4.41703e-08	460654	ieu-b-4760	Number of children || id:ieu-b-4760	TRUE	reported	igd	2	TRUE	NA	NA	6.46724e-05	460654	4.43428e-05	21037	TRUE	0.844499
3	rs2360806	C	A	C	A	0.0163464	0.0091	0.1666	NA	FALSE	FALSE	FALSE	ieu-b-4851	8	53125734	0.0131	22656	0.4863	Wellbeing || id:ieu-b-4851	Wellbeing	Wellbeing || ||	TRUE	igd	8	53125734	0.0027	1.01e-09	460654	ieu-b-4760	Number of children || id:ieu-b-4760	TRUE	reported	igd	2	TRUE	NA	NA	7.95624e-05	460654	2.13003e-05	22656	TRUE	0.527035
4	rs4870063	A	C	A	C	-0.0145776	0.0145	0.6443	NA	FALSE	FALSE	FALSE	ieu-b-4851	6	152244647	0.0097	22656	0.1353	Wellbeing || id:ieu-b-4851	Wellbeing	Wellbeing || ||	TRUE	igd	6	152244647	0.0021	1.37088e-12	460654	ieu-b-4760	Number of children || id:ieu-b-4760	TRUE	reported	igd	2	TRUE	NA	NA	0.000104596	460654	9.8629e-05	22656	TRUE	0.965305
5	rs62054570	G	T	G	T	-0.0153417	-0.0135	0.1585	NA	FALSE	FALSE	FALSE	ieu-b-4851	16	90063890	0.0131	22656	0.3031	Wellbeing || id:ieu-b-4851	Wellbeing	Wellbeing || ||	TRUE	igd	16	90063890	0.0028	2.25502e-08	460654	ieu-b-4760	Number of children || id:ieu-b-4760	TRUE	reported	igd	2	TRUE	NA	NA	6.51677e-05	460654	4.6877e-05	22656	TRUE	0.857032
6	rs6782190	A	G	A	G	-0.0197197	-0.0004	0.6467	NA	FALSE	FALSE	FALSE	ieu-b-4851	3	85639672	0.0097	22656	0.968	Wellbeing || id:ieu-b-4851	Wellbeing	Wellbeing || ||	TRUE	igd	3	85639672	0.0021	8.22243e-22	460654	ieu-b-4760	Number of children || id:ieu-b-4760	TRUE	reported	igd	2	TRUE	NA	NA	0.000191385	460654	7.5064e-08	22656	TRUE	0.0462985
7	rs6800021	A	G	A	G	0.0121422	-0.0035	0.4251	NA	FALSE	FALSE	FALSE	ieu-b-4851	3	50190346	0.0094	22656	0.7076	Wellbeing || id:ieu-b-4851	Wellbeing	Wellbeing || ||	TRUE	igd	3	50190346	0.002	1.032e-09	460654	ieu-b-4760	Number of children || id:ieu-b-4760	TRUE	reported	igd	2	TRUE	NA	NA	8.00067e-05	460654	6.11974e-06	22656	TRUE	0.341678
8	rs72687493	A	C	A	C	0.0116077	0.0072	0.3627	NA	FALSE	FALSE	FALSE	ieu-b-4851	14	79603782	0.0099	22656	0.4647	Wellbeing || id:ieu-b-4851	Wellbeing	Wellbeing || ||	TRUE	igd	14	79603782	0.0021	2.48302e-08	460654	ieu-b-4760	Number of children || id:ieu-b-4760	TRUE	reported	igd	2	TRUE	NA	NA	6.63214e-05	460654	2.33475e-05	22656	TRUE	0.626495

## Sheet: s tab 4
	id.outcome	id.exposure	outcome	exposure	method	nsnp	b	se.mr	pval.mr	Q	Q_df	Q_pval	egger_intercept	se.egger_intercept	pval.egger_intercept	isq_mr	isq_ge	f_stat
1	ieu-a-1009	ieu-b-4760	Subjective well being || id:ieu-a-1009	Number of children || id:ieu-b-4760	Inverse variance weighted	6	0.152611	0.184637	0.408494	24.5913	5	0.000167067	-0.0042081	0.0168578	0.815174	0.796676	0.982488	49.1826
2	ieu-a-1009	ieu-b-4760	Subjective well being || id:ieu-a-1009	Number of children || id:ieu-b-4760	MR Egger	6	0.423254	1.10339	0.720796	24.2141	4	7.24e-05	-0.0042081	0.0168578	0.815174	0.796676	0.982488	49.1826
3	ieu-a-1009	ieu-b-4760	Subjective well being || id:ieu-a-1009	Number of children || id:ieu-b-4760	Weighted median	6	0.0897629	0.130861	0.492749	NA	NA	NA	-0.0042081	0.0168578	0.815174	0.796676	0.982488	49.1826
4	ieu-a-1009	ieu-b-4760	Subjective well being || id:ieu-a-1009	Number of children || id:ieu-b-4760	Weighted mode	6	-0.0219159	0.165124	0.899588	NA	NA	NA	-0.0042081	0.0168578	0.815174	0.796676	0.982488	49.1826
31	ieu-a-1009	ieu-b-4760	Subjective well being || id:ieu-a-1009	Number of children || id:ieu-b-4760	MR PRESSO	4	0.11176	0.161477	0.538627	36.5529	Q output = presso distortion test	0.514	35.2017	Egger intercept output for presso = presso global test	0.006	0.796676	0.982488	49.1826
41	ieu-a-1009	ieu-b-4760	Subjective well being || id:ieu-a-1009	Number of children || id:ieu-b-4760	MR RAPS	6	0.170964	0.167639	0.307809	NA	NA	NA	-0.0042081	0.0168578	0.815174	0.796676	0.982488	49.1826
11	ieu-a-1009	ieu-b-4760	Subjective well being || id:ieu-a-1009	Number of childern, p<5Em6	Inverse variance weighted	50	0.101405	0.0532025	0.056648	77.2632	49	0.00614599	0.00137191	0.00277734	0.623584	0.362165	0.96144	25.4358
21	ieu-a-1009	ieu-b-4760	Subjective well being || id:ieu-a-1009	Number of childern, p<5Em6	MR Egger	50	-0.0148142	0.24131	0.951303	76.8725	48	0.00510527	0.00137191	0.00277734	0.623584	0.362165	0.96144	25.4358
32	ieu-a-1009	ieu-b-4760	Subjective well being || id:ieu-a-1009	Number of childern, p<5Em6	Weighted median	50	0	0.0661968	1	NA	NA	NA	0.00137191	0.00277734	0.623584	0.362165	0.96144	25.4358
42	ieu-a-1009	ieu-b-4760	Subjective well being || id:ieu-a-1009	Number of childern, p<5Em6	Weighted mode	50	-0.0288118	0.129199	0.824461	NA	NA	NA	0.00137191	0.00277734	0.623584	0.362165	0.96144	25.4358
311	ieu-a-1009	ieu-b-4760	Subjective well being || id:ieu-a-1009	Number of childern, p<5Em6	MR PRESSO	49	0.0579161	0.0498417	0.250751	NA	Q output = presso distortion test	NA	83.7178	Egger output for presso = presso global test	0.006	0.362165	0.96144	25.4358
411	ieu-a-1009	ieu-b-4760	Subjective well being || id:ieu-a-1009	Number of childern, p<5Em6	MR RAPS	50	0.0848584	0.0548844	0.122073	NA	NA	NA	0.00137191	Egger intercept output for presso = presso global test	0.623584	0.362165	0.96144	25.4358
12	ieu-b-4851	ieu-b-4760	Within family wellbeing	Number of children || id:ieu-b-4760	Inverse variance weighted	8	-0.0487796	0.247145	0.843536	5.34221	7	0.618278	-0.00664393	0.0212876	0.765524	0	0.980258	44.3638
22	ieu-b-4851	ieu-b-4760	Within family wellbeing	Number of children || id:ieu-b-4760	MR Egger	8	0.385475	1.41316	0.794171	5.2448	6	0.51282	-0.00664393	0.0212876	0.765524	0	0.980258	44.3638
33	ieu-b-4851	ieu-b-4760	Within family wellbeing	Number of children || id:ieu-b-4760	Simple mode	8	0.250876	0.487171	0.622435	NA	NA	NA	-0.00664393	0.0212876	0.765524	0	0.980258	44.3638
43	ieu-b-4851	ieu-b-4760	Within family wellbeing	Number of children || id:ieu-b-4760	Weighted median	8	0.00974608	0.318618	0.975598	NA	NA	NA	-0.00664393	0.0212876	0.765524	0	0.980258	44.3638
412	ieu-b-4851	ieu-b-4760	Within family wellbeing	Number of children || id:ieu-b-4760	MR RAPS	8	-0.0495061	0.253797	0.845344	NA	NA	NA	-0.00664393	0.0212876	0.765524	0	0.980258	44.3638

## Sheet: s tab 5
	id.exposure	id.outcome	outcome	exposure	method	nsnp	b	se	pval
1	ieu-b-4760	ukb-b-1997	Number of older siblings || id:ukb-b-1997	Number of children || id:ieu-b-4760	Inverse variance weighted	8	0.114932	0.0818262	0.160146
2	ieu-b-4760	ukb-b-4263	Number of full brothers || id:ukb-b-4263	Number of children || id:ieu-b-4760	Inverse variance weighted	8	0.327857	0.0463802	1.56147e-12
3	ieu-b-4760	ukb-b-5593	Number of full sisters || id:ukb-b-5593	Number of children || id:ieu-b-4760	Inverse variance weighted	8	0.257841	0.0923971	0.00526146
4	ieu-b-4760	ukb-d-1747_1	Hair colour (natural, before greying): Blonde || id:ukb-d-1747_1	Number of children || id:ieu-b-4760	Inverse variance weighted	8	-0.0880397	0.10925	0.420328
5	ieu-b-4760	ukb-d-1747_2	Hair colour (natural, before greying): Red || id:ukb-d-1747_2	Number of children || id:ieu-b-4760	Inverse variance weighted	8	-0.479142	0.583109	0.411246
6	ieu-b-4760	ukb-d-1747_3	Hair colour (natural, before greying): Light brown || id:ukb-d-1747_3	Number of children || id:ieu-b-4760	Inverse variance weighted	8	0.0887961	0.0895994	0.321669
7	ieu-b-4760	ukb-d-1747_4	Hair colour (natural, before greying): Dark brown || id:ukb-d-1747_4	Number of children || id:ieu-b-4760	Inverse variance weighted	8	0.386469	0.5363	0.471142
8	ieu-b-4760	ukb-d-1747_5	Hair colour (natural, before greying): Black || id:ukb-d-1747_5	Number of children || id:ieu-b-4760	Inverse variance weighted	8	0.100557	0.0956105	0.292919
9	ieu-b-4760	ukb-d-1747_6	Hair colour (natural, before greying): Other || id:ukb-d-1747_6	Number of children || id:ieu-b-4760	Inverse variance weighted	8	-0.0243353	0.0280537	0.385693
