# Supplementary figures and images for: Exploring the Lifetime Effect of Children on Wellbeing Using Two-Sample Mendelian Randomisation
Source: MDPI journal article supplement (doi:10.3390/genes14030716), 2023-03-14

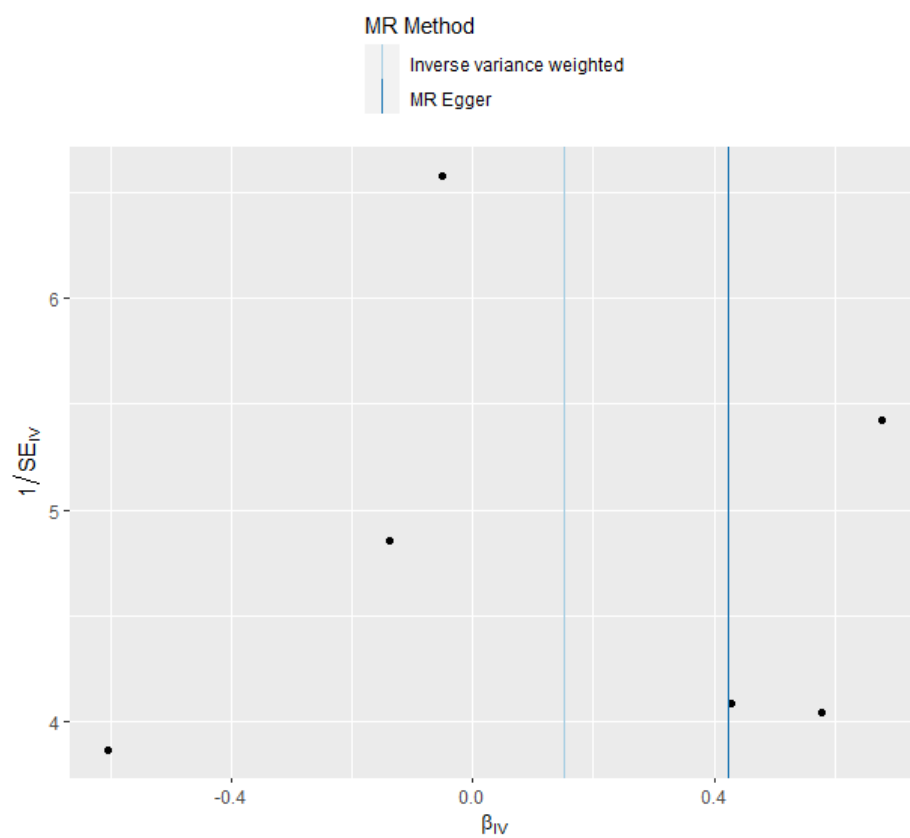

Supplementary Figure S5: Funnel plot for the primary analysis.

Supplement: s1 [file s1]

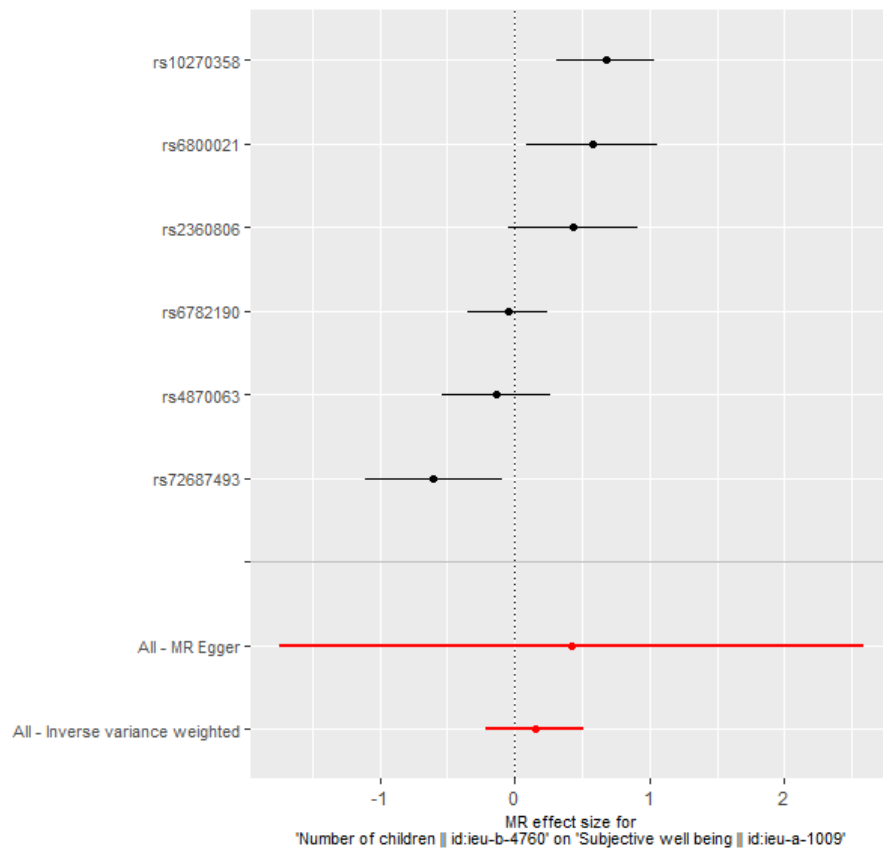

Supplementary Figure S4: Forest plot for the SNP specific Wald ratios for the primary analysis.

Supplement: s1 [file s1]

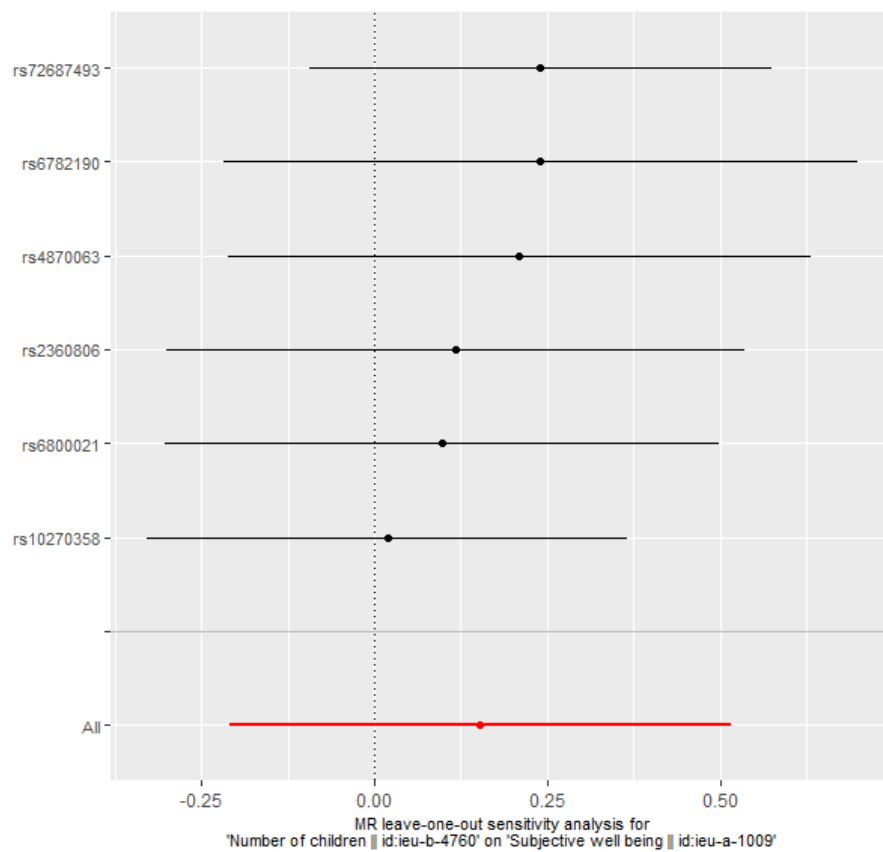

Supplementary Figure S6: Leave-one-out sensitivity analysis.

Supplement: s1 [file s1]
